# Supplementary material for: High-throughput real-time PCR-based genotyping without DNA purification
Source: PubMed Central journal article supplement (PMC3505170; doi:10.1186/1756-0500-5-573), 2012-10-19

# Supplementary Figure 1. Methodology Comparison

## A. DNA Purified from Blood

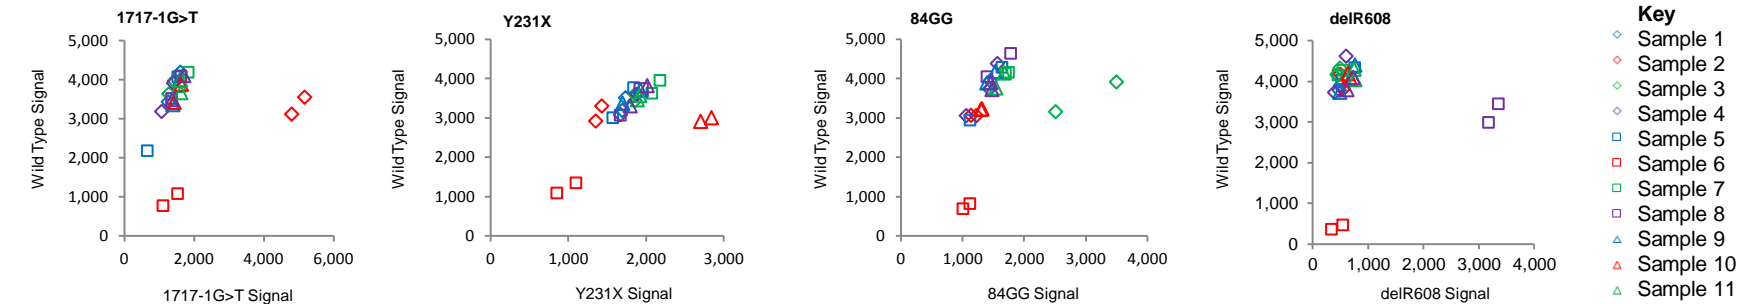

## B. Blood without DNA Purification

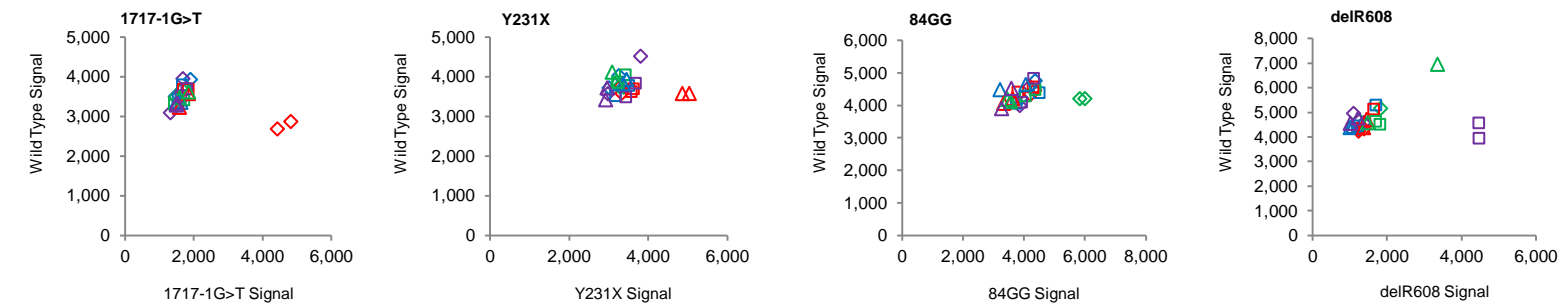

Supplement: 1756-0500-5-573-S1.pdf [file 1756-0500-5-573-S1.pdf]
